# Supplementary material for: Synthesis and evaluation of a glucose attached pyrene, as a fluorescent molecular probe in sugar and non-sugar based micro-heterogeneous media
Source: Royal Society of Chemistry journal article supplement (doi:10.1039/c5ra11481k), 2015-01-01
Supplement: c5ra11481k1.pdf [file c5ra11481k1.pdf]

## Supporting Information

### Synthesis and Evaluation of a Glucose Attached Pyrene as a Fluorescent Molecular Probe in Sugar and Non-sugar Based Micro-heterogeneous Media

Ivy Sarkar<sup>a</sup>, Hema Malini<sup>b</sup>, Prof. Dr. Thangamuthu Mohan Das<sup>\*b</sup>, Prof. Dr. Ashok Kumar

Mishra<sup>\*a</sup>

<sup>a</sup> Department of Chemistry, Indian Institute of Technology Madras, Chennai – 600 036, India

<sup>b</sup> Department of Organic Chemistry, University of Madras, Guindy Campus, Chennai – 600 025,  
India

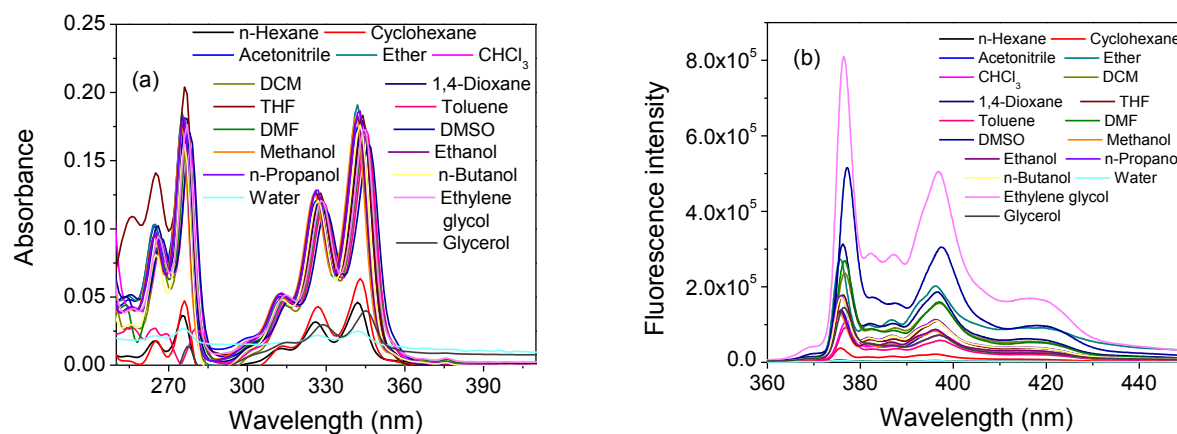

Figure S1: (a) Absorption spectra and (b) fluorescence spectra ( $\lambda_{\text{ex}} = 340 \text{ nm}$ ) of pyd-glc at 4 μM in solvents of different polarity.

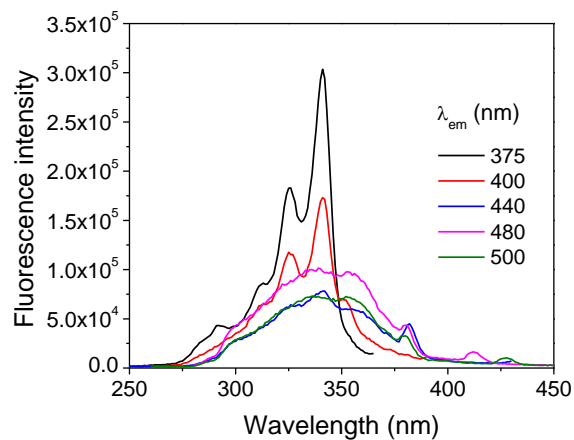

Figure S2: Fluorescence excitation spectra of pyd-glc (4  $\mu\text{M}$ ) in water with the variation of emission wavelength.

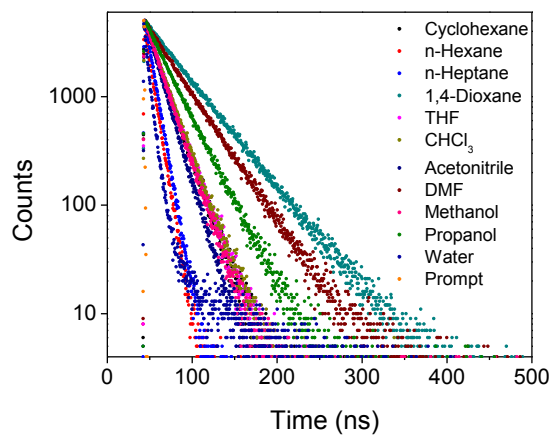

Figure S3: Fluorescence lifetime decay profiles of pyd-glc in different solvents, at  $\lambda_{\text{ex}} = 340 \text{ nm}$ ,  $\lambda_{\text{em}} = 375 \text{ nm}$ .

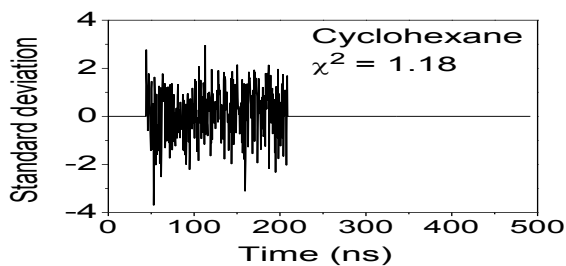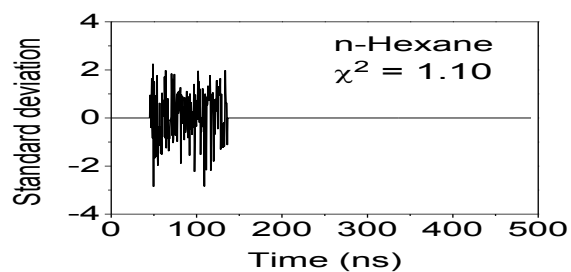

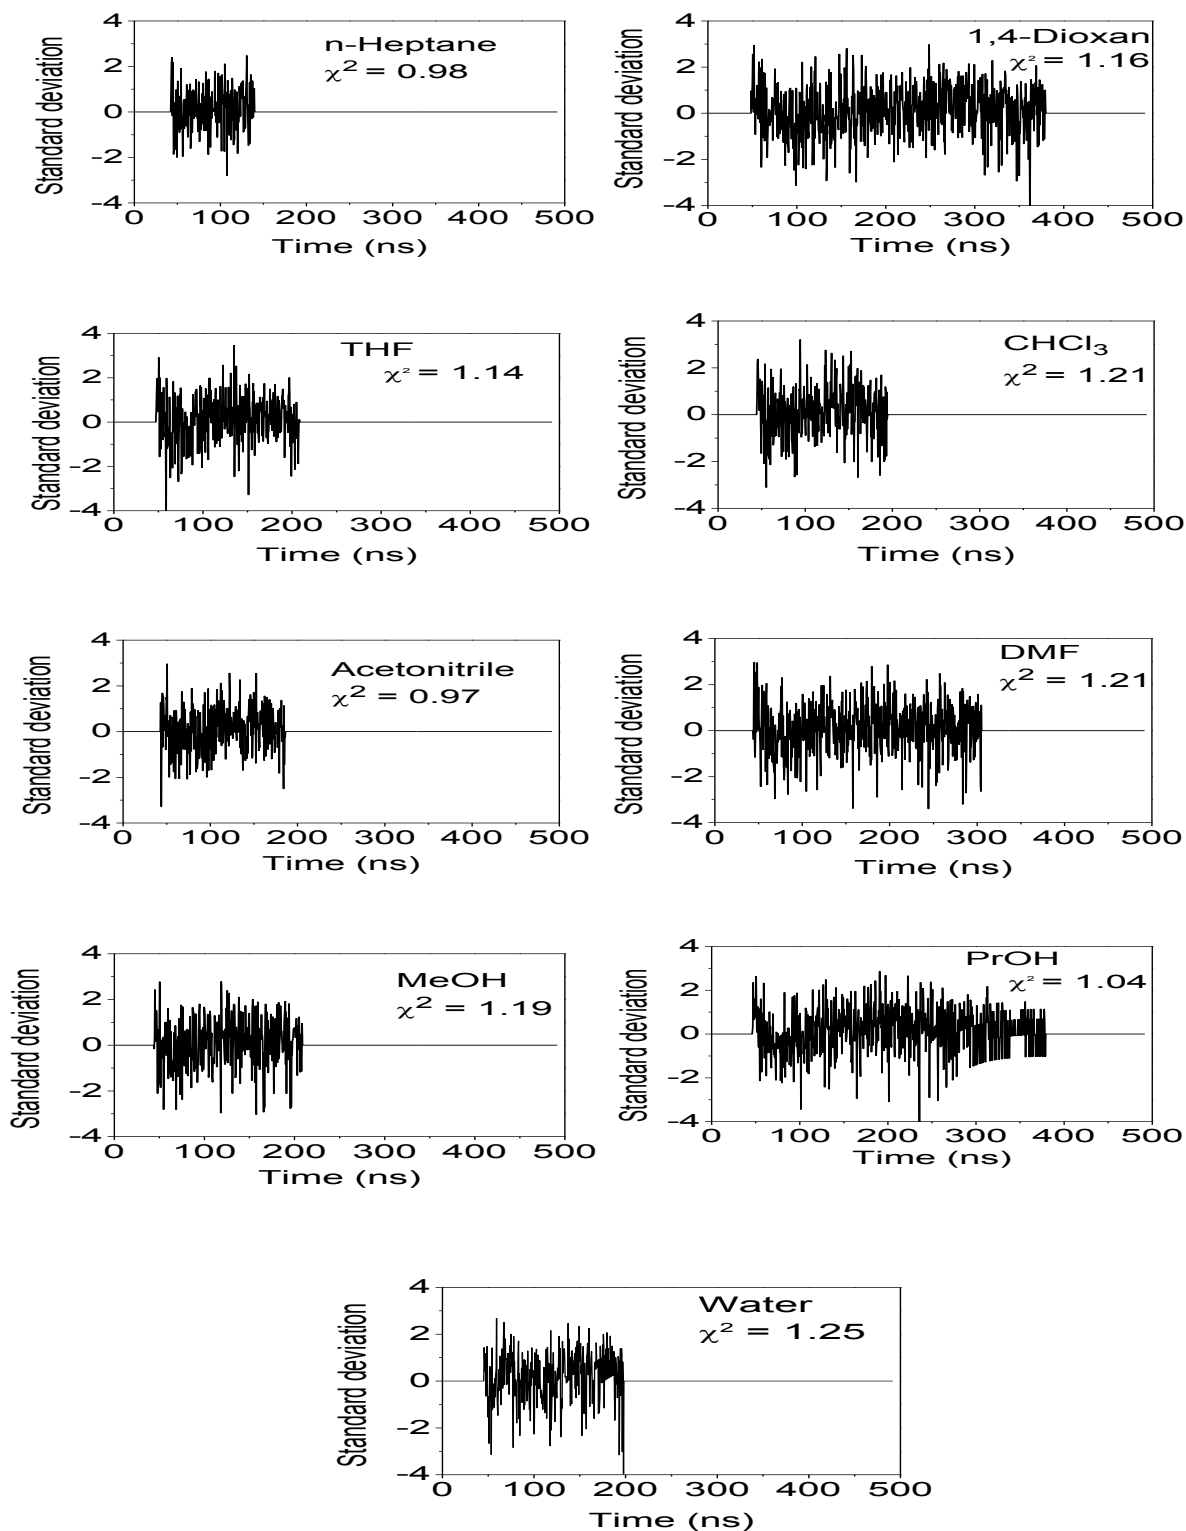

Figure S4: Residue distribution plots of pyd-glc in different solvents (corresponds to Table 1).

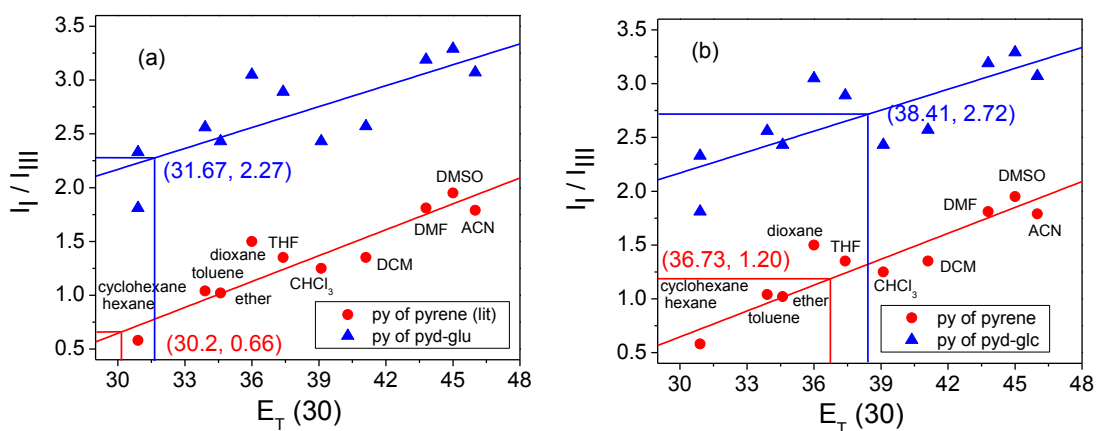

Figure S5: Determination of the medium polarity from py value using  $E_T(30)$  scale for (a)  $\beta$ -CD and (d) tween 20 media.

Table S1: Fluorescence lifetime data of pyd-glc ( $\lambda_{ex} = 340$  nm,  $\lambda_{em} = 375$  nm) in  $\beta$ -CD media.

| [ $\beta$ -CD] (mM) | $\tau_1$ ( $\beta_1$ ) | $\tau_2$ ( $\beta_2$ ) | $\tau_{aveg}$ (ns) | $\chi^2$ |
|---------------------|------------------------|------------------------|--------------------|----------|
| 0                   | 6.23 (0.98)            | 50.58 (0.02)           | 7.12               | 1.05     |
| 1                   | 6.61 (0.93)            | 59.76 (0.07)           | 10.33              | 1.06     |
| 2                   | 8.36 (0.91)            | 68.49 (0.09)           | 13.77              | 1.06     |
| 3                   | 13.61 (0.77)           | 81.71 (0.23)           | 29.27              | 1.20     |
| 4                   | 20.02 (0.74)           | 105.43 (0.26)          | 42.23              | 1.21     |
| 5                   | 20.82 (0.72)           | 104.59 (0.28)          | 44.28              | 1.16     |
| 6                   | 29.47 (0.70)           | 118.04 (0.30)          | 56.04              | 1.15     |
| 7                   | 23.87 (0.75)           | 123.22 (0.25)          | 48.71              | 1.08     |
| 8                   | 29.61 (0.72)           | 128.79 (0.28)          | 57.38              | 1.21     |
| 9                   | 29.82 (0.70)           | 133.81 (0.30)          | 61.02              | 1.07     |
| 10                  | 30.09 (0.65)           | 138.88 (0.35)          | 68.17              | 1.09     |
| 12                  | 33.88 (0.64)           | 150.41 (0.36)          | 75.83              | 1.12     |
| 14                  | 34.13 (0.63)           | 155.50 (0.37)          | 79.04              | 1.11     |
| 16                  | 36.92 (0.66)           | 163.08 (0.34)          | 79.81              | 1.08     |

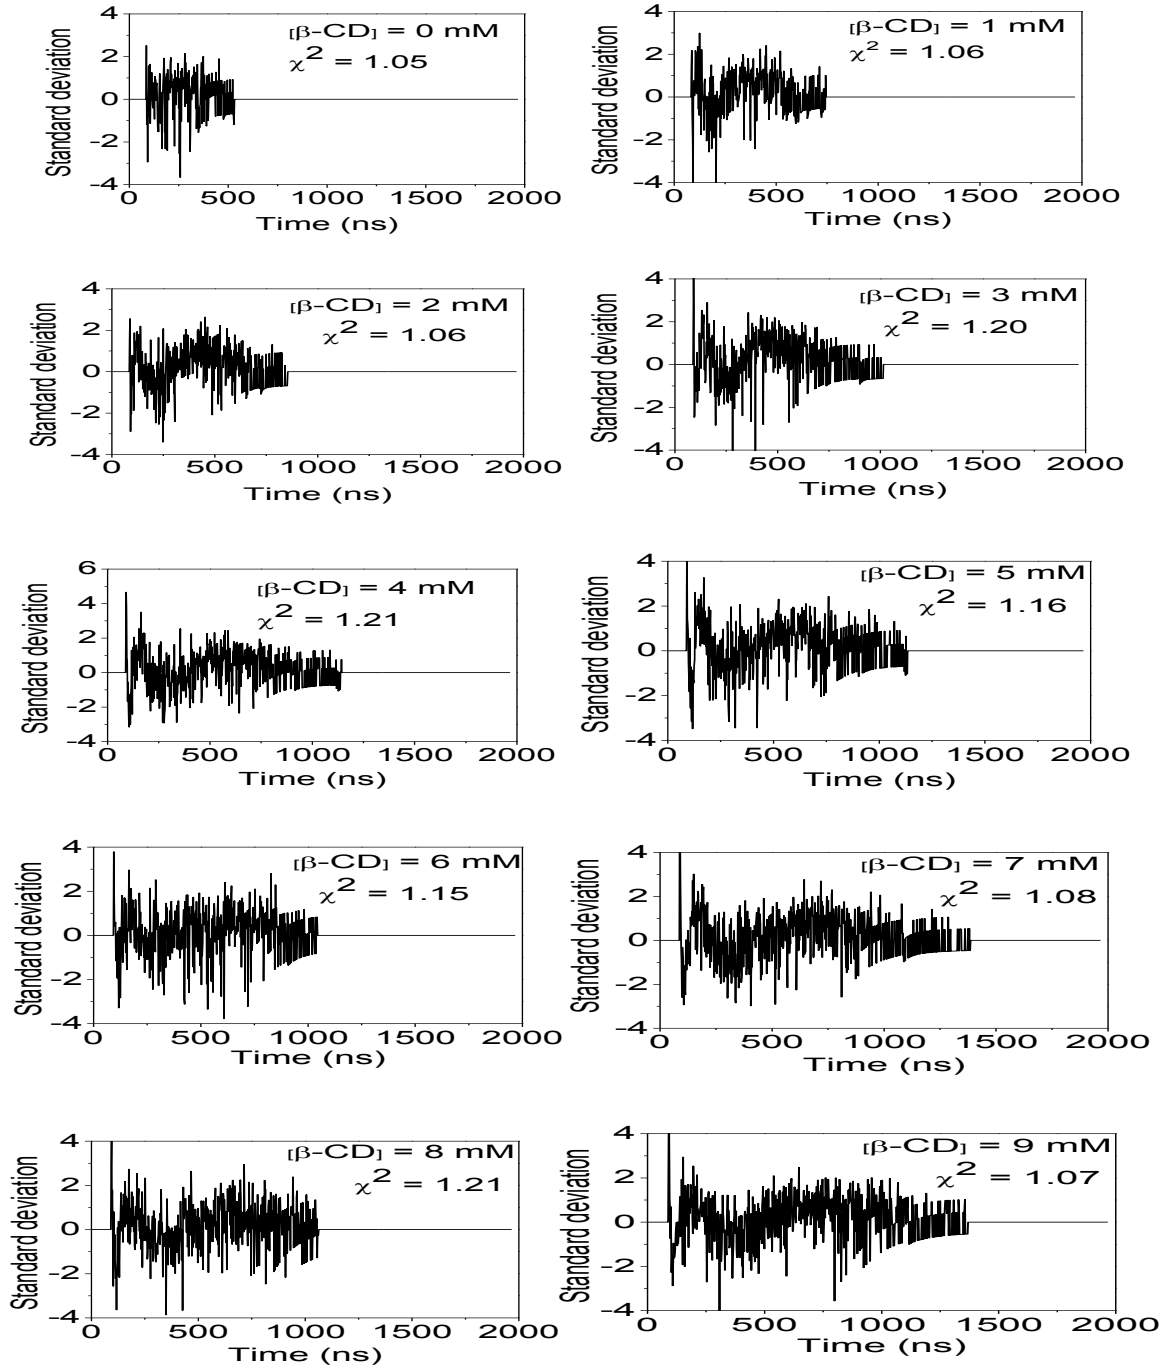

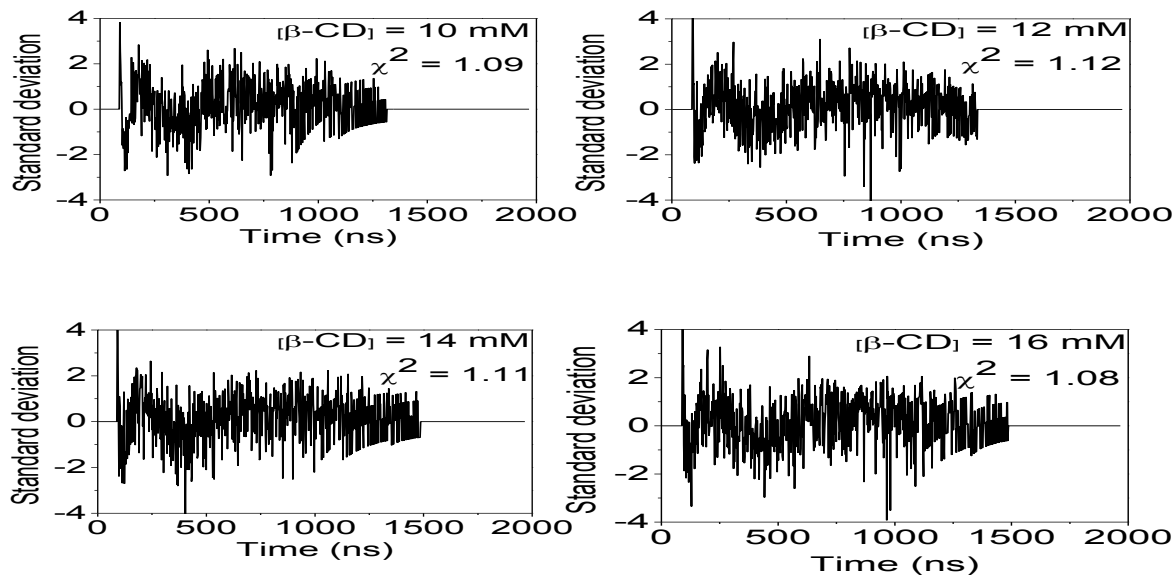

Figure S6: Residue distribution plots of pyd-glc in  $\beta$ -CD (corresponds to Table S1).

Table S2: Fluorescence lifetime data of pyd-glc ( $\lambda_{\text{ex}} = 340 \text{ nm}$ ,  $\lambda_{\text{em}} = 375 \text{ nm}$ ) in tween-20 media.

| [Tween-20] (mM) | $\tau_1$ ( $\beta_1$ ) | $\tau_2$ ( $\beta_2$ ) | $\tau_{\text{aveg}}$ (ns) | $\chi^2$ |
|-----------------|------------------------|------------------------|---------------------------|----------|
| 0               | 6.23 (0.98)            | 50.58 (0.02)           | 7.12                      | 1.05     |
| 0.01            | 14.88 (0.71)           | 91.85 (0.29)           | 37.20                     | 1.10     |
| 0.02            | 17.68 (0.59)           | 107.60 (0.41)          | 54.55                     | 1.09     |
| 0.03            | 22.19 (0.55)           | 112.13 (0.45)          | 62.66                     | 1.02     |
| 0.04            | 18.05 (0.46)           | 114.20 (0.54)          | 69.97                     | 0.99     |
| 0.05            | 30.58 (0.37)           | 119.94 (0.63)          | 86.88                     | 1.11     |
| 0.06            | 31.43 (0.38)           | 120.45 (0.62)          | 86.62                     | 1.00     |
| 0.07            | 15.25 (0.38)           | 115.88 (0.62)          | 77.64                     | 1.00     |
| 0.08            | 21.09 (0.39)           | 120.05 (0.61)          | 81.46                     | 1.02     |
| 0.09            | 33.41 (0.28)           | 122.46 (0.72)          | 97.53                     | 1.11     |
| 0.10            | 33.57 (0.30)           | 125.60 (0.70)          | 97.99                     | 0.99     |
| 0.13            | 29.11 (0.26)           | 123.51 (0.74)          | 98.97                     | 1.11     |
| 0.15            | 33.51 (0.22)           | 124.72 (0.78)          | 104.65                    | 1.19     |
| 0.17            | 45.03 (0.22)           | 129.12 (0.78)          | 110.62                    | 1.13     |

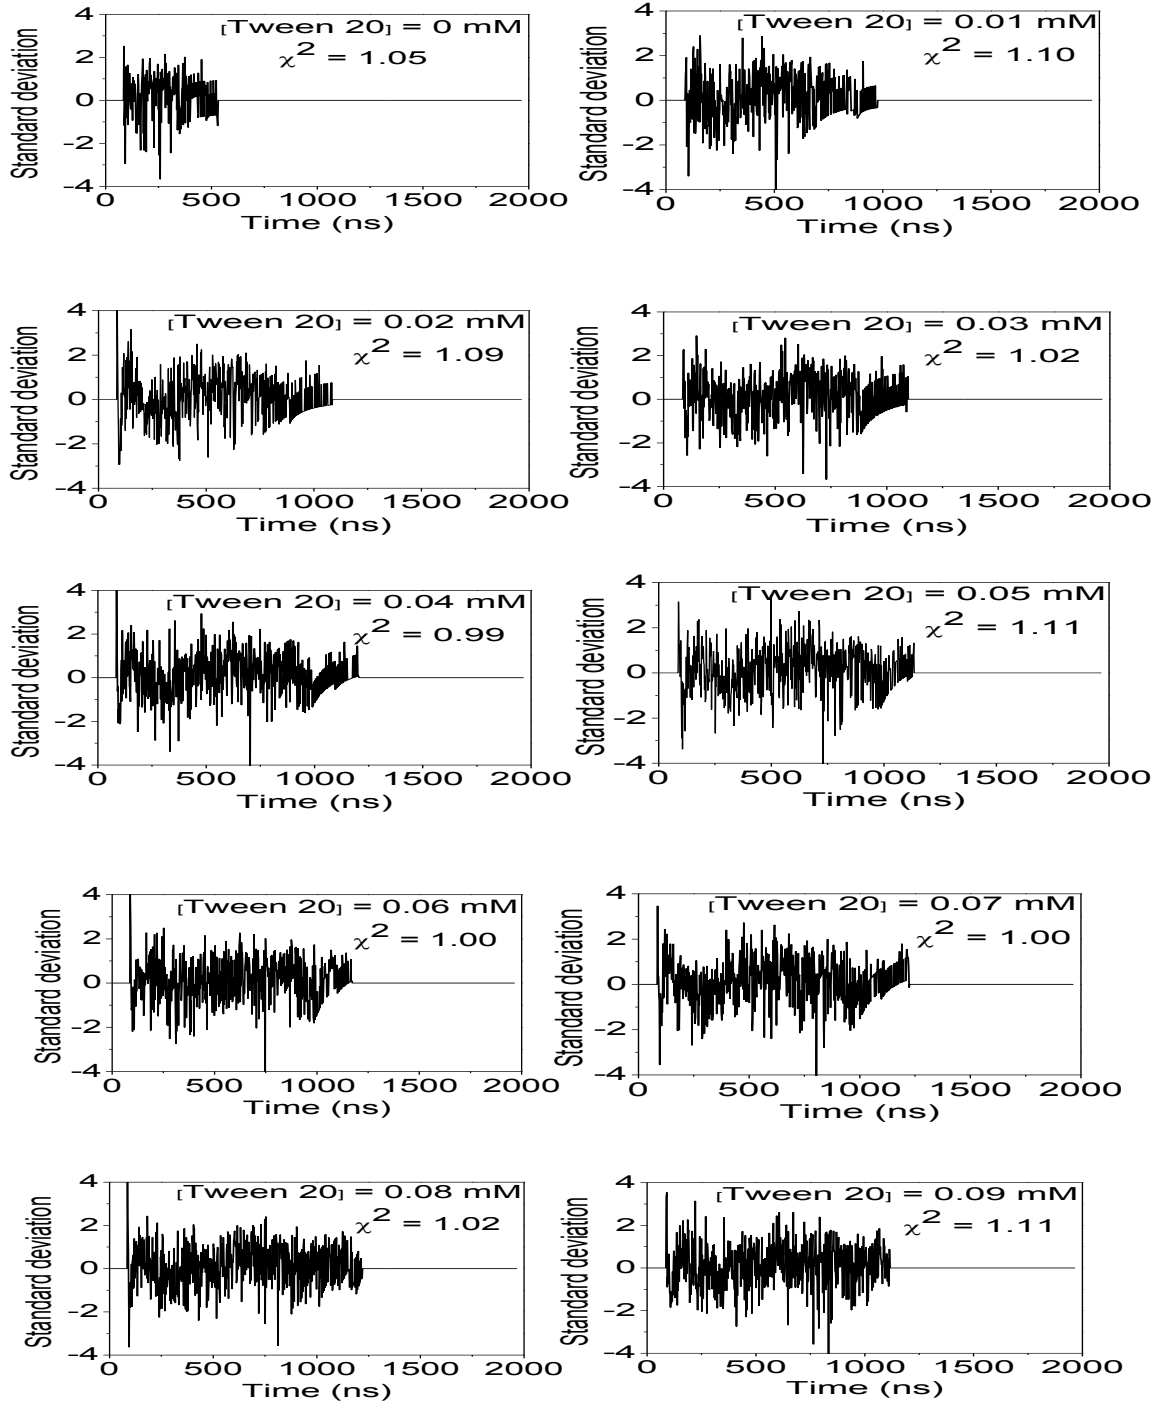

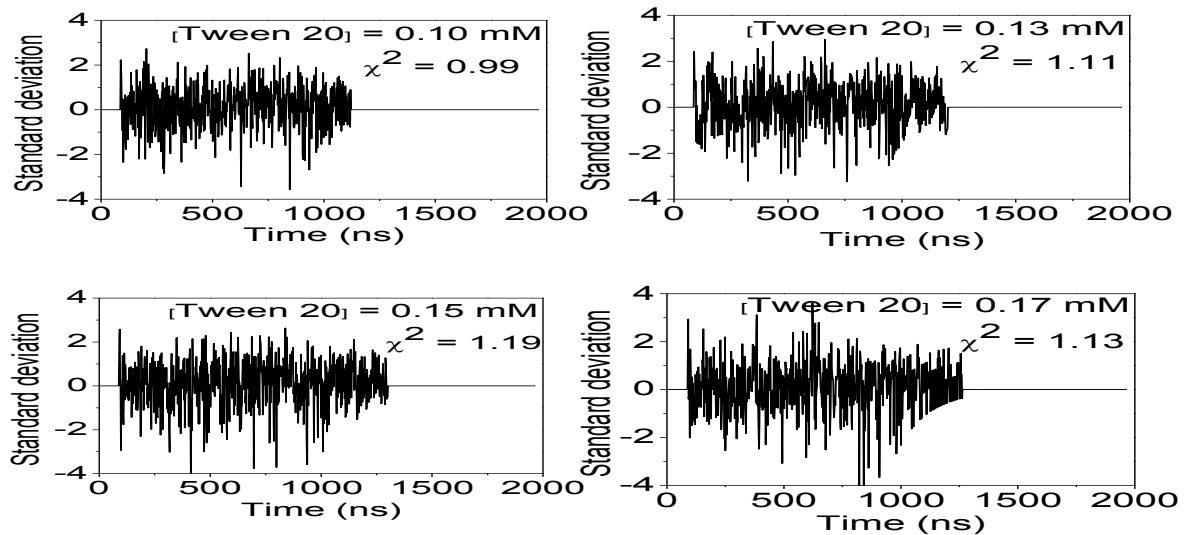

Figure S7: Residue distribution plots of pyd-glc in tween 20 (corresponds to Table S2).

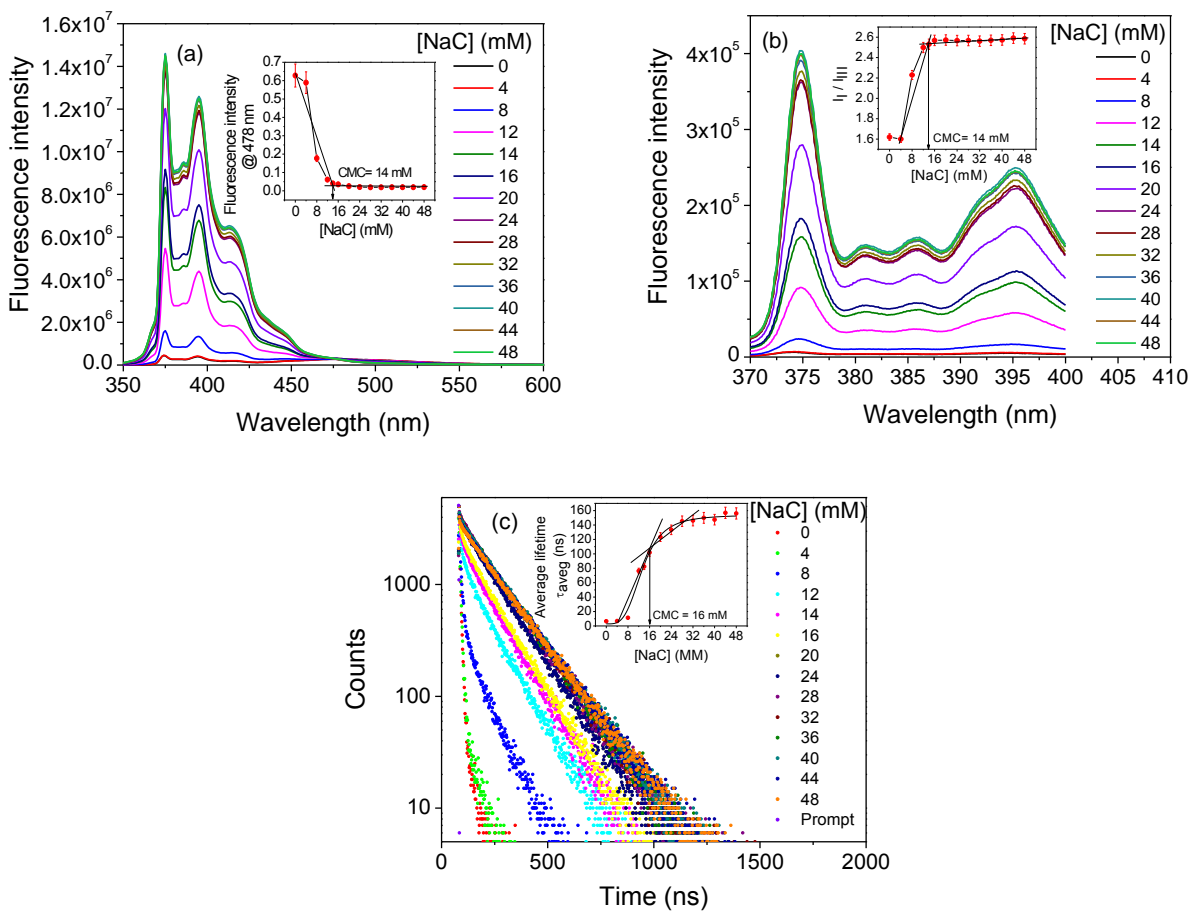



Figure S8: (a) Fluorescence spectra of pyd-glc (4  $\mu\text{M}$ ) with increasing concentration of NaC, inset shows decrease of excimer fluorescence intensity, (b) fluorescence spectra of pyd-glc (4  $\mu\text{M}$ ) with increasing concentration of NaC under high resolution, inset shows variation of  $I_I / I_{III}$  value; here  $\lambda_{\text{ex}} = 340 \text{ nm}$  and (c) fluorescence lifetime decay profiles of pyd-glc in NaC media, at  $\lambda_{\text{ex}} = 340 \text{ nm}$ ,  $\lambda_{\text{em}} = 375 \text{ nm}$ .

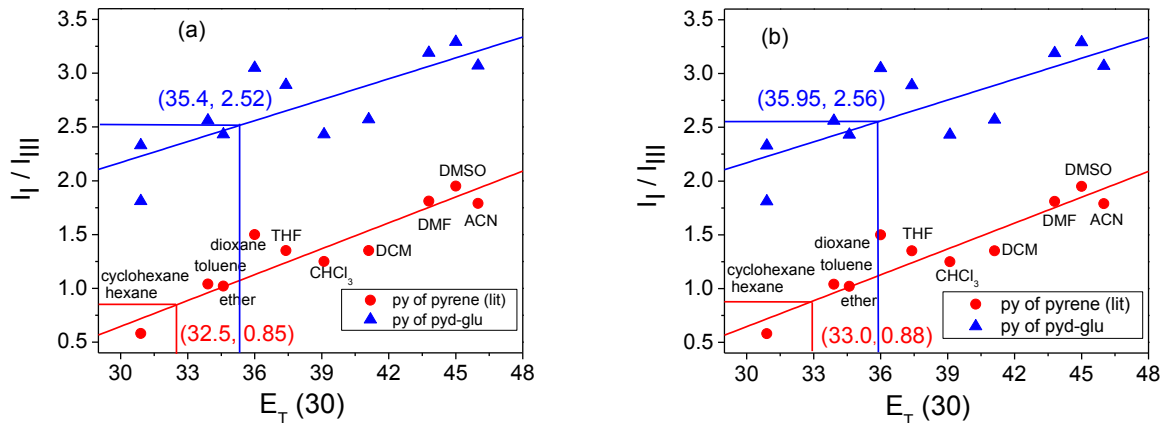

Figure S9: Determination of the medium polarity from py value using  $E_T$  (30) scale for (a) NaDC and (b) NaC media.

Table S3: Fluorescence lifetime data of pyd-glc ( $\lambda_{\text{ex}} = 340 \text{ nm}$ ,  $\lambda_{\text{em}} = 375 \text{ nm}$ ) in NaDC.

| [NaDC] (mM) | $\tau_1$ ( $\beta_1$ ) | $\tau_2$ ( $\beta_2$ ) | $\tau_{\text{aveg}}$ (ns) | $\chi^2$ |
|-------------|------------------------|------------------------|---------------------------|----------|
| 0           | 6.23 (0.98)            | 50.58 (0.02)           | 7.12                      | 1.05     |
| 1           | 6.28 (0.99)            | 48.65 (0.01)           | 6.70                      | 1.14     |
| 2           | 8.55 (0.99)            | 66.75 (0.01)           | 9.13                      | 1.08     |
| 3           | 10.72 (0.75)           | 85.42 (0.25)           | 29.39                     | 1.30     |
| 4           | 24.44 (0.57)           | 123.15 (0.43)          | 66.89                     | 1.11     |
| 5           | 31.62 (0.38)           | 141.50 (0.62)          | 99.75                     | 1.01     |
| 6           | 28.77 (0.24)           | 143.78 (0.76)          | 116.18                    | 1.14     |
| 7           | 24.34 (0.21)           | 145.14 (0.79)          | 119.77                    | 1.34     |
| 8           | 33.62 (0.23)           | 149.40 (0.77)          | 122.77                    | 1.01     |
| 10          | 73.14 (0.26)           | 164.14 (0.74)          | 140.48                    | 1.09     |
| 12          | 74.03 (0.20)           | 163.83 (0.80)          | 145.87                    | 1.13     |
| 14          | 63.49 (0.16)           | 164.11 (0.84)          | 148.01                    | 1.08     |
| 16          | 61.90 (0.14)           | 165.40 (0.86)          | 150.91                    | 1.04     |
| 18          | 93.89 (0.22)           | 172.65 (0.78)          | 155.32                    | 1.17     |

Table S4: Fluorescence lifetime data of pyd-glc ( $\lambda_{\text{ex}} = 340 \text{ nm}$ ,  $\lambda_{\text{em}} = 375 \text{ nm}$ ) in NaC.

| [NaC] (mM) | $\tau_1$ ( $\beta_1$ ) | $\tau_2$ ( $\beta_2$ ) | $\tau_{\text{aveg}}$ (ns) | $\chi^2$ |
|------------|------------------------|------------------------|---------------------------|----------|
| 0          | 6.23 (0.98)            | 50.58 (0.02)           | 7.12                      | 1.05     |
| 4          | 6.35 (0.99)            | 47.62 (0.01)           | 6.76                      | 1.07     |
| 8          | 8.89 (0.97)            | 91.16 (0.03)           | 11.36                     | 1.14     |
| 12         | 19.27 (0.44)           | 121.06 (0.56)          | 76.27                     | 1.12     |
| 14         | 26.27 (0.46)           | 130.17 (0.54)          | 82.38                     | 1.13     |
| 16         | 23.72 (0.29)           | 133.70 (0.71)          | 101.81                    | 1.02     |
| 20         | 44.15 (0.23)           | 147.85 (0.77)          | 123.99                    | 1.08     |
| 24         | 74.75 (0.24)           | 151.85 (0.76)          | 133.35                    | 1.03     |
| 28         | 81.34 (0.19)           | 160.30 (0.81)          | 145.30                    | 1.14     |
| 32         | 37.00 (0.11)           | 159.60 (0.89)          | 146.11                    | 1.13     |
| 36         | 50.52 (0.11)           | 162.22 (0.89)          | 149.93                    | 1.13     |
| 40         | 51.39 (0.16)           | 165.72 (0.84)          | 147.43                    | 1.03     |
| 44         | 79.21 (0.14)           | 169.55 (0.86)          | 156.90                    | 1.24     |
| 48         | 79.65 (0.17)           | 171.67 (0.83)          | 156.03                    | 1.28     |

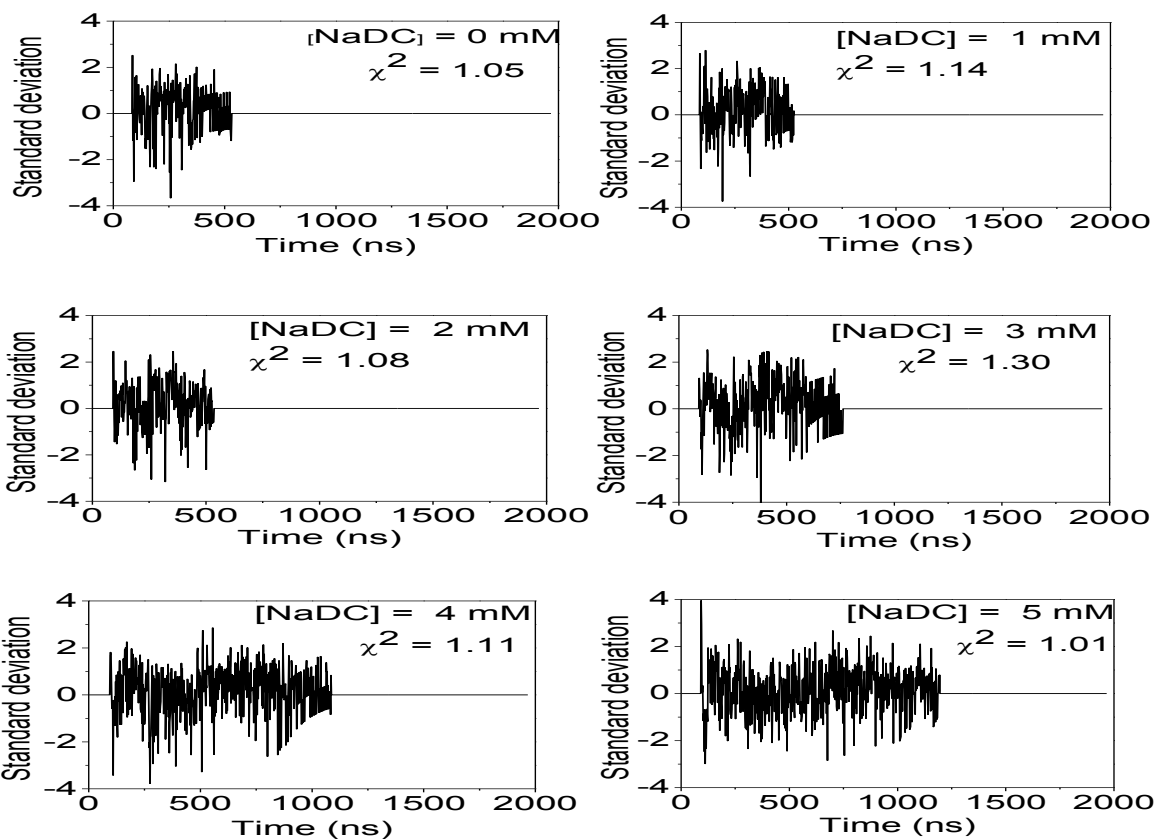

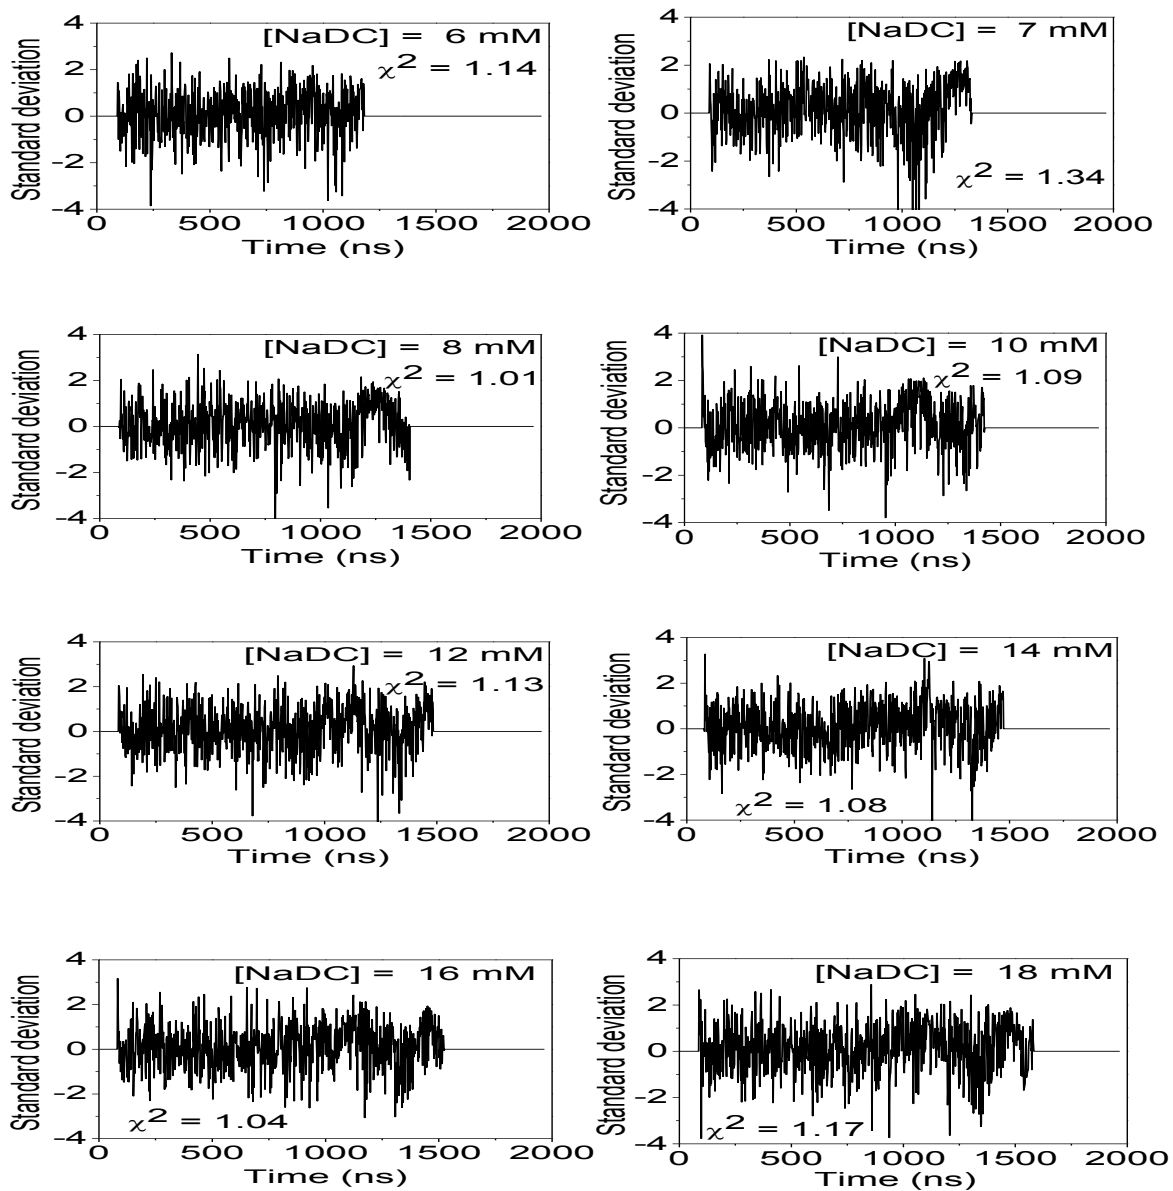

Figure S10: Residue distribution plots of pyd-glc in and NaDC (corresponds to Table S3).

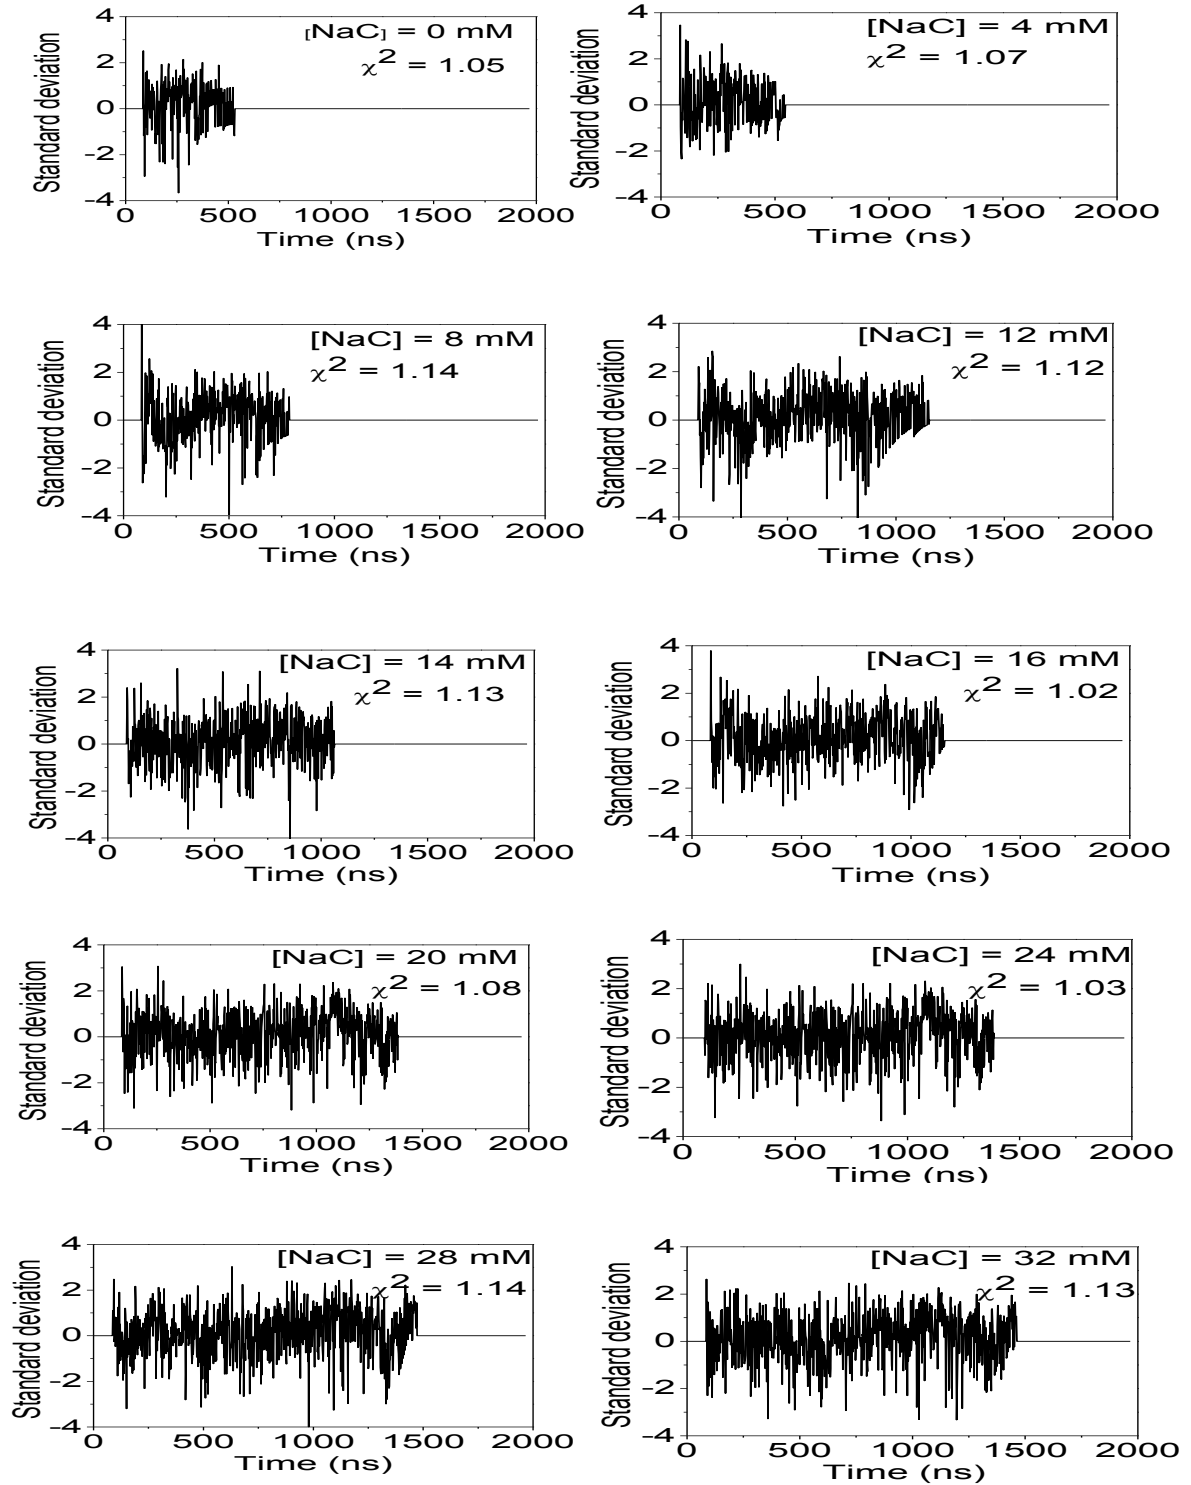

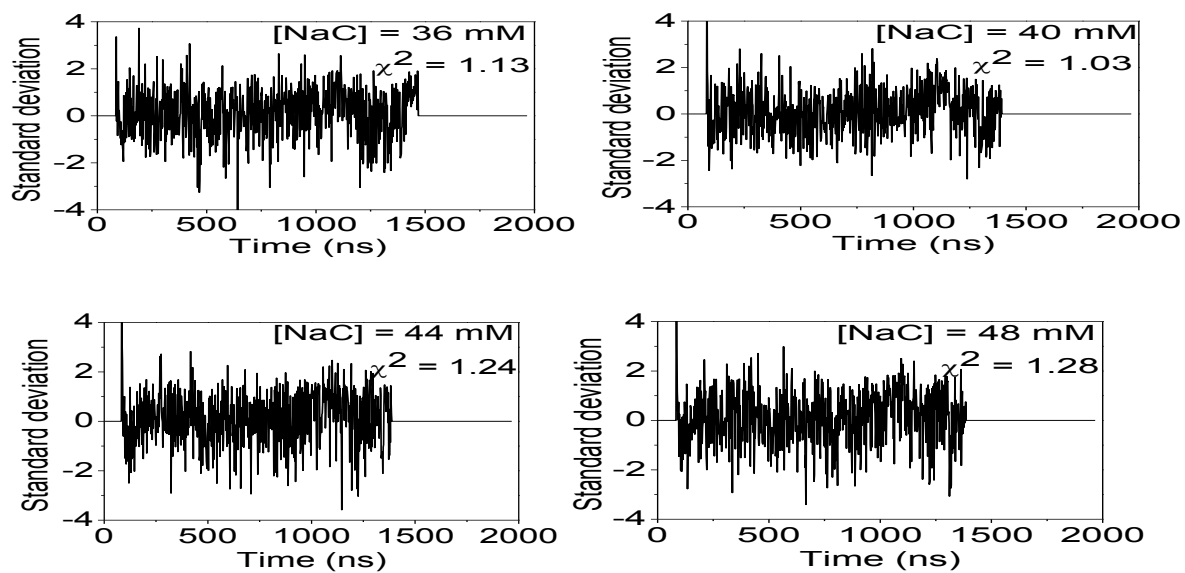

Figure S11: Residue distribution plots of pyd-glc in NaC (corresponds to Table S4).

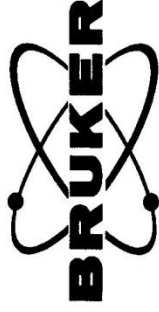

Current Data Parameters  
 NAME TMDH-TGM-2  
 EXPNO 1  
 PROCNO 1

F2 - Acquisition Parameters  
 Date 20130524  
 Time 16.33  
 INSTRUM spect  
 PROBHD 5 mm DUL 13C-1  
 PULPROG zg30  
 TD 65536  
 SOLVENT CDC13  
 NS 17  
 DS 2  
 SWH 6172.839 Hz  
 FIDRES 0.094190 Hz  
 AQ 5.3084660 sec  
 RG 287.4  
 DW 81.000 usec  
 DE 6.00 usec  
 TE 300.0 K  
 D1 1.00000000 sec  
 TD0 1

==== CHANNEL f1 =====  
 NUC1 1H  
 P1 13.15 usec  
 PL1 0.00 dB  
 SF01 300.1318534 MHz

F2 - Processing parameters  
 SI 32768  
 SF 300.1300070 MHz  
 WDW EM  
 SSB 0  
 LB 0.30 Hz  
 GB 0  
 PC 1.00

8.225  
8.194  
8.178  
8.161  
8.152  
8.125  
8.110  
8.094  
8.084  
8.021  
7.993  
7.967  
7.882  
7.856  
7.259  
4.344  
4.327  
4.310  
4.041  
4.023  
3.654  
3.629  
3.604  
3.238  
3.230  
3.216  
3.036  
3.008  
2.983  
2.851  
2.839  
2.772  
2.760  
2.692  
2.680  
2.654  
1.597  
1.589  
1.573  
1.565  
1.558  
1.542  
1.418  
1.393  
1.367  
0.930  
0.906  
0.882

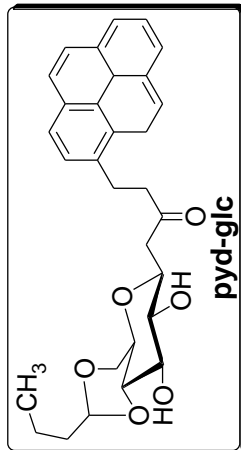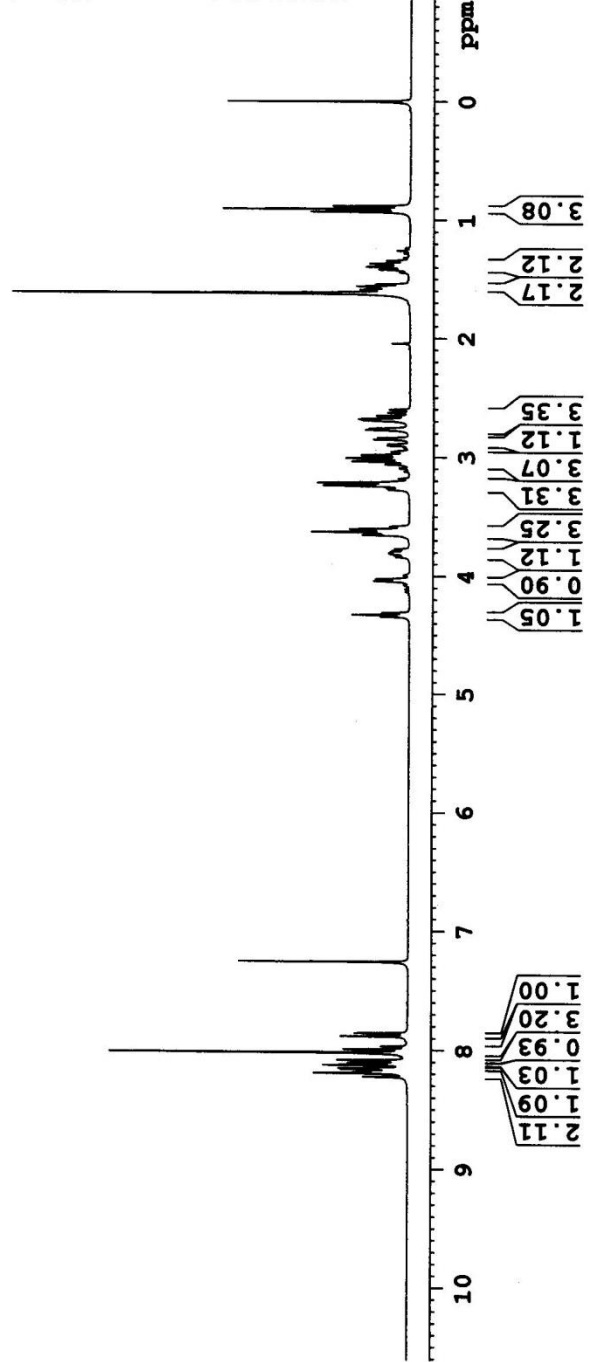

Figure S12: <sup>1</sup>H NMR spectrum (300 MHz, CDCl<sub>3</sub>) of compound, pyd-glc.

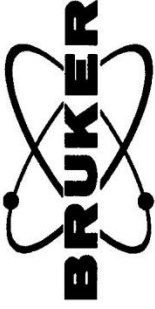

Current Data Parameters  
 NAME TMDH-TGM-2  
 EXPNO 2  
 PROCNO 1

F2 - Acquisition Parameters  
 Date\_ 20130525  
 Time\_ 22.58  
 INSTRUM spect  
 PROBHD 5 mm DUL 13C-1  
 PULPROG zgpg30  
 TD 65536  
 SOLVENT CDCl3  
 NS 1024  
 DS 4  
 SWH 17985.611 Hz  
 FIDRES 0.274439 Hz  
 AQ 1.8219508 sec  
 RG 1448.2  
 DW 27.800 usec  
 DE 6.00 usec  
 TE 300.0 K  
 D1 2.0000000 sec  
 d11 0.0300000 sec  
 DELTA 1.89999998 sec  
 TD0 1

==== CHANNEL f1 =====  
 NUC1 13C  
 P1 9.30 usec  
 PL1 0.00 dB  
 SFO1 75.4752953 MHz

==== CHANNEL f2 =====  
 CPDPRG2 waltz16  
 NUC2 1H  
 PCPD2 80.00 usec  
 PL2 0.00 dB  
 PLI2 15.68 dB  
 PLI3 16.00 dB  
 SFO2 300.1312005 MHz

F2 - Processing parameters  
 SI 32768  
 SF 75.4677490 MHz  
 WDW EM  
 SSB 0  
 LB 0  
 GB 0  
 PC 1.40

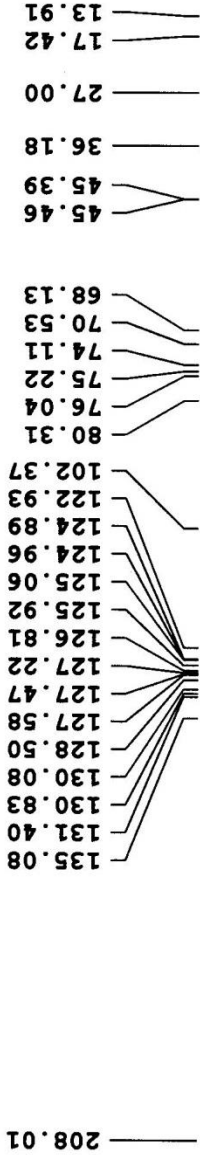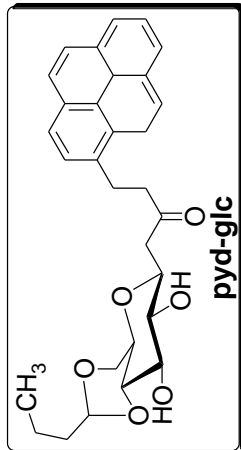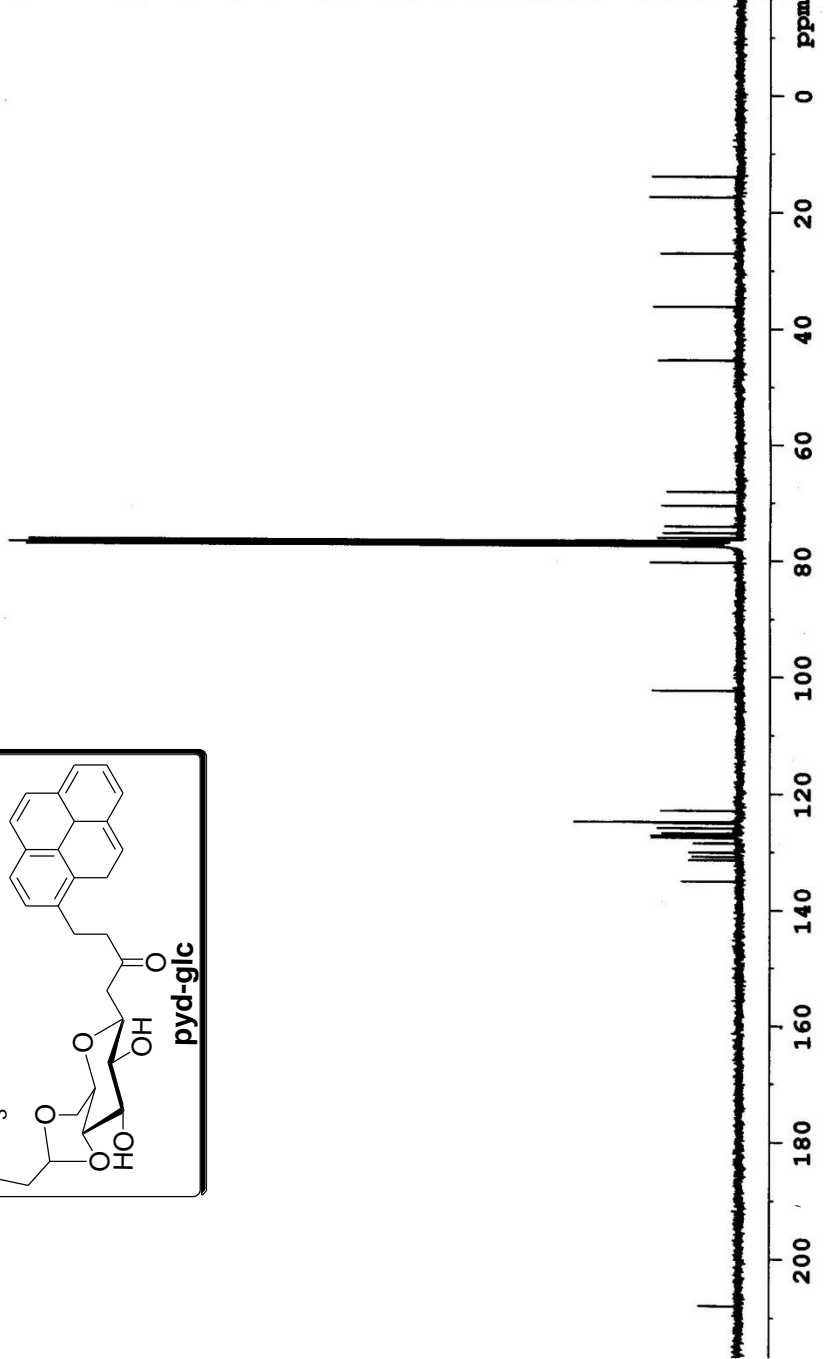

Figure S13: <sup>13</sup>C NMR spectrum (75 MHz, CDCl<sub>3</sub>) of compound, pyd-glc.

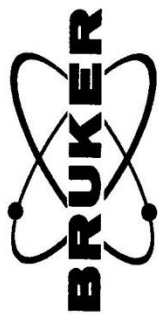

Current Data Parameters  
 NAME TMDH-TGM-2  
 EXPNO 2  
 PROCNO 1

F2 - Acquisition Parameters  
 Date 20130524  
 Time 17.14  
 INSTRUM spect  
 PROBHD 5 mm DUL 13C-1  
 PULPROG dept135  
 TD 65536  
 SOLVENT CDCl3  
 NS 192  
 DS 4  
 SWH 17985.611 Hz  
 FIDRES 0.274439 Hz  
 AQ 1.8219508 sec  
 RG 16384  
 DW 27.800 usec  
 DE 6.00 usec  
 TE 300.0 K  
 CNST2 145.000000  
 D1 2.0000000 sec  
 d2 0.00344828 sec  
 d12 0.0002000 sec  
 DELTA 0.00001184 sec  
 TDO 1

==== CHANNEL f1 =====  
 NUC1 13C  
 P1 9.30 usec  
 P2 18.60 usec  
 PL1 0.00 dB  
 SF01 75.4752953 MHz

==== CHANNEL f2 =====  
 CPDPRG2 waltz16  
 NUC2 1H  
 P3 13.15 usec  
 P4 26.30 usec  
 PCPD2 80.00 usec  
 PL2 0.00 dB  
 PL12 15.68 dB  
 SFO2 300.1312005 MHz

F2 - Processing parameters  
 SI 32768  
 SF 75.4677490 MHz  
 WDW EM  
 SSB 0  
 LB 1.00 Hz  
 GB 0  
 PC 1.40

127.58  
 127.47  
 127.24  
 126.82  
 125.93  
 125.06  
 124.89  
 122.94  
 102.37  
 80.29  
 76.02  
 75.20  
 74.08  
 70.52  
 68.13  
 45.47  
 45.38  
 36.18  
 27.00  
 17.43  
 13.93

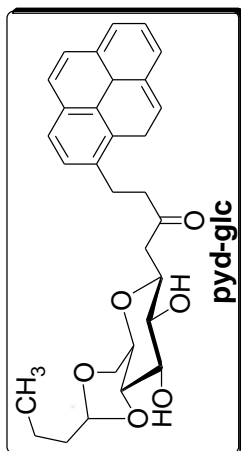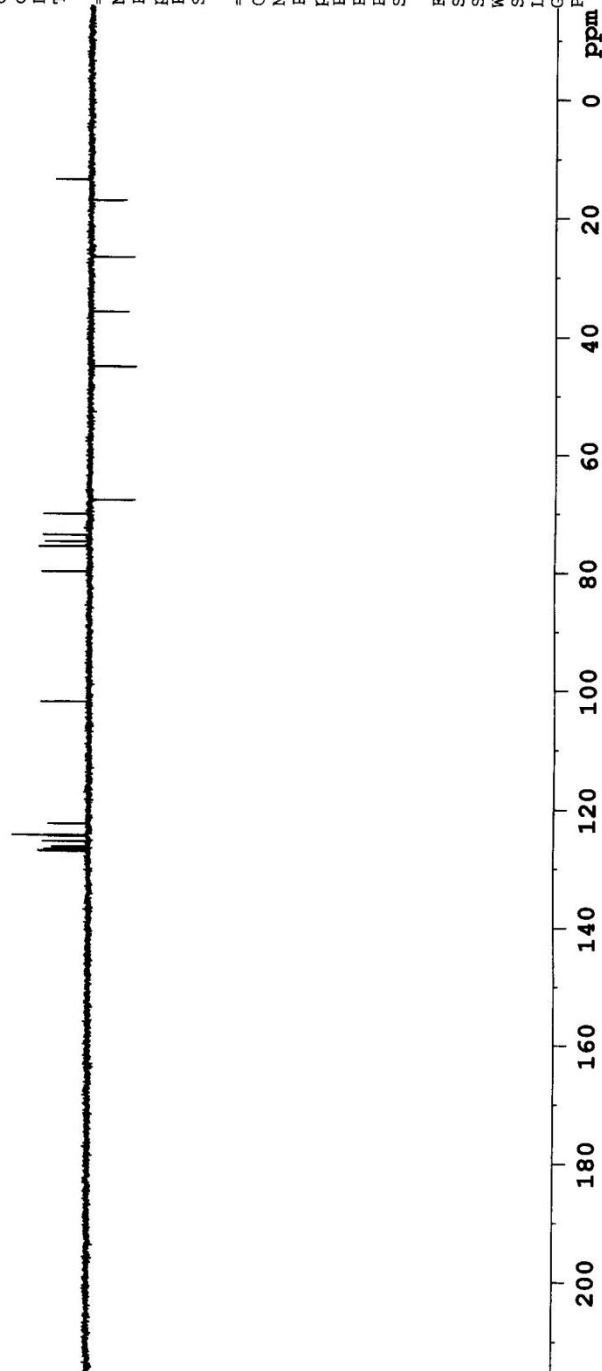

Figure S14: DEPT-135 spectrum (75 MHz, CDCl<sub>3</sub>) of compound, pyd-glc.



QTOF MICRO

DEPARTMENT OF CHEMISTRY IITM

AKM-PYD-GLU-RED 68 (1.270) Sb (5,40.00) ; Sm (Mn, 2x4.00) ; Cm (36:152)

10-Sep-2013 13:27:54  
TOF MS ES+  
2.76e3

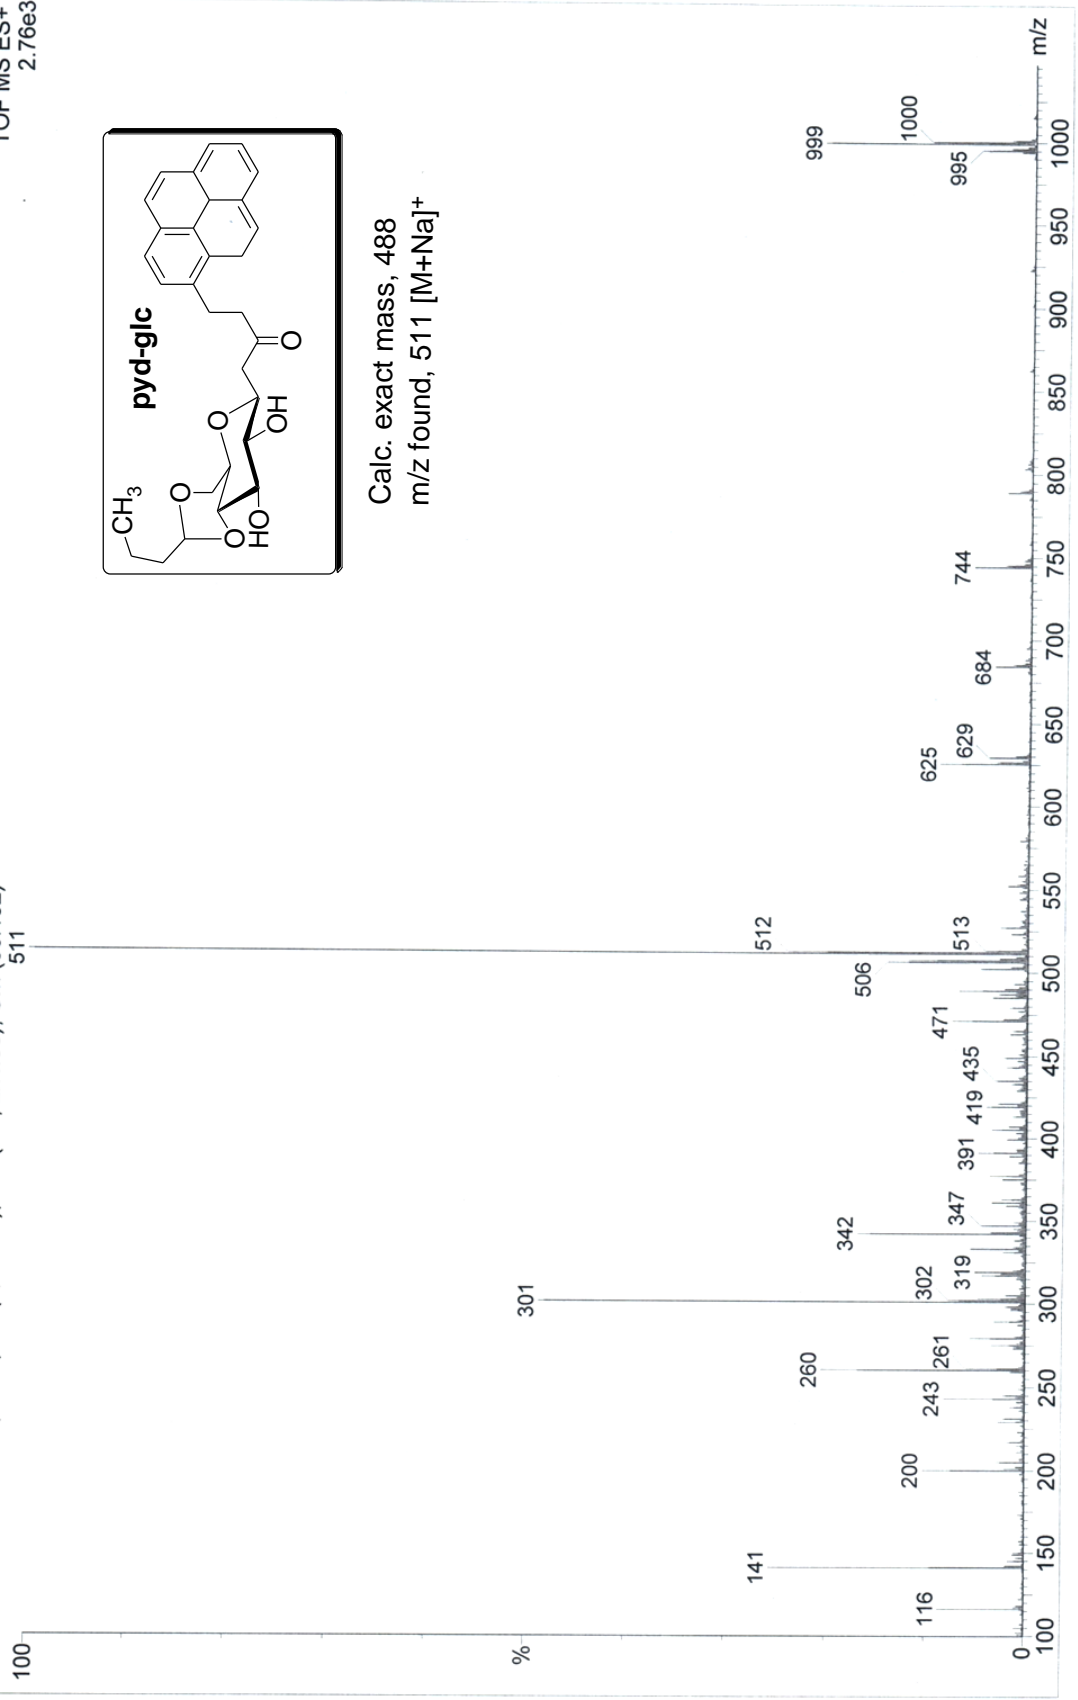

Figure S15: Mass spectrum of compound, pyd-glc.
